# Supplementary material for: Acetylene carbonylation over Ni-containing catalysts: role of surface structure and active site distribution
Source: Royal Society of Chemistry journal article supplement (doi:10.1039/c6ra17567h), 2016-01-01
Supplement: c6ra17567h1.pdf [file c6ra17567h1.pdf]

**Electronic Supporting information (ESI)**

**Acetylene carbonylation over Ni-Containing Catalysts: Role of  
Texture and Active Site Distribution**

**Hao Xie, Tiejun Lin, Li Shi, Xuan Meng\***

*State Key Laboratory of Chemical Engineering, East China University of Science and  
Technology, Shanghai 200237, China*

---

\* To whom correspondence should be addressed. E-mail: mengxuan@ecust.edu.cn  
Tel.: 021-64252383.

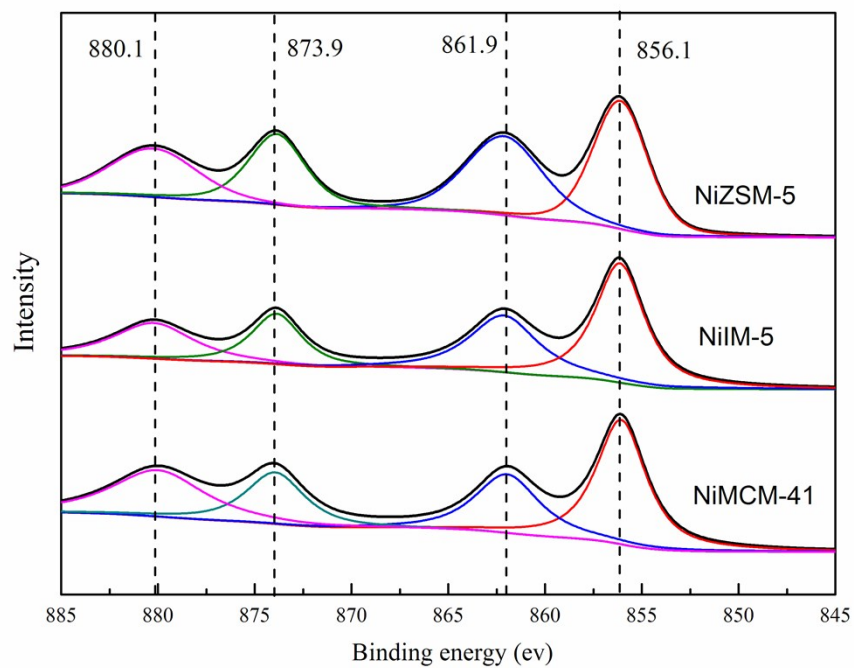

**Figure S1. XPS patterns of nickel ion on various Ni modified catalysts**

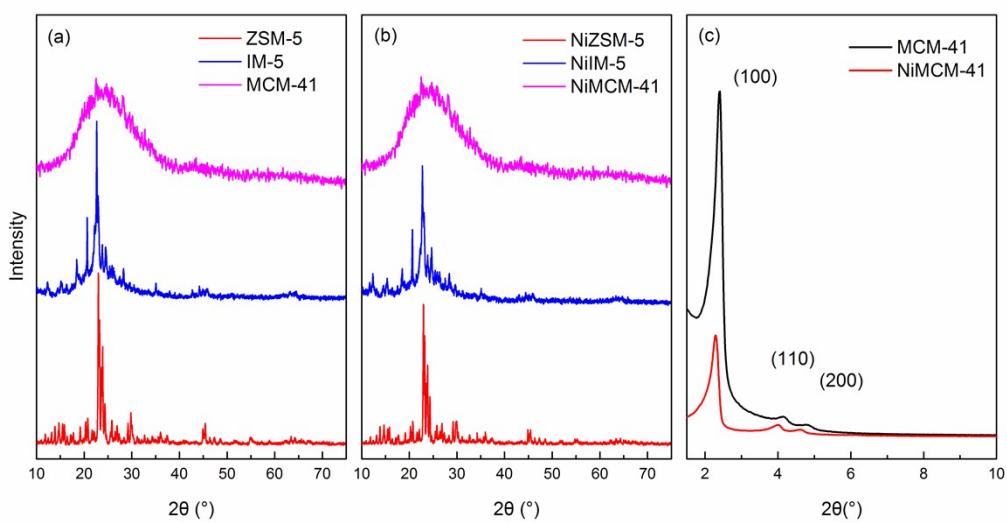

**Fig. S2. X-ray diffraction patterns of samples: (a). parent materials (b). modified catalyst (c). (Ni)MCM-41 in small-angle range**

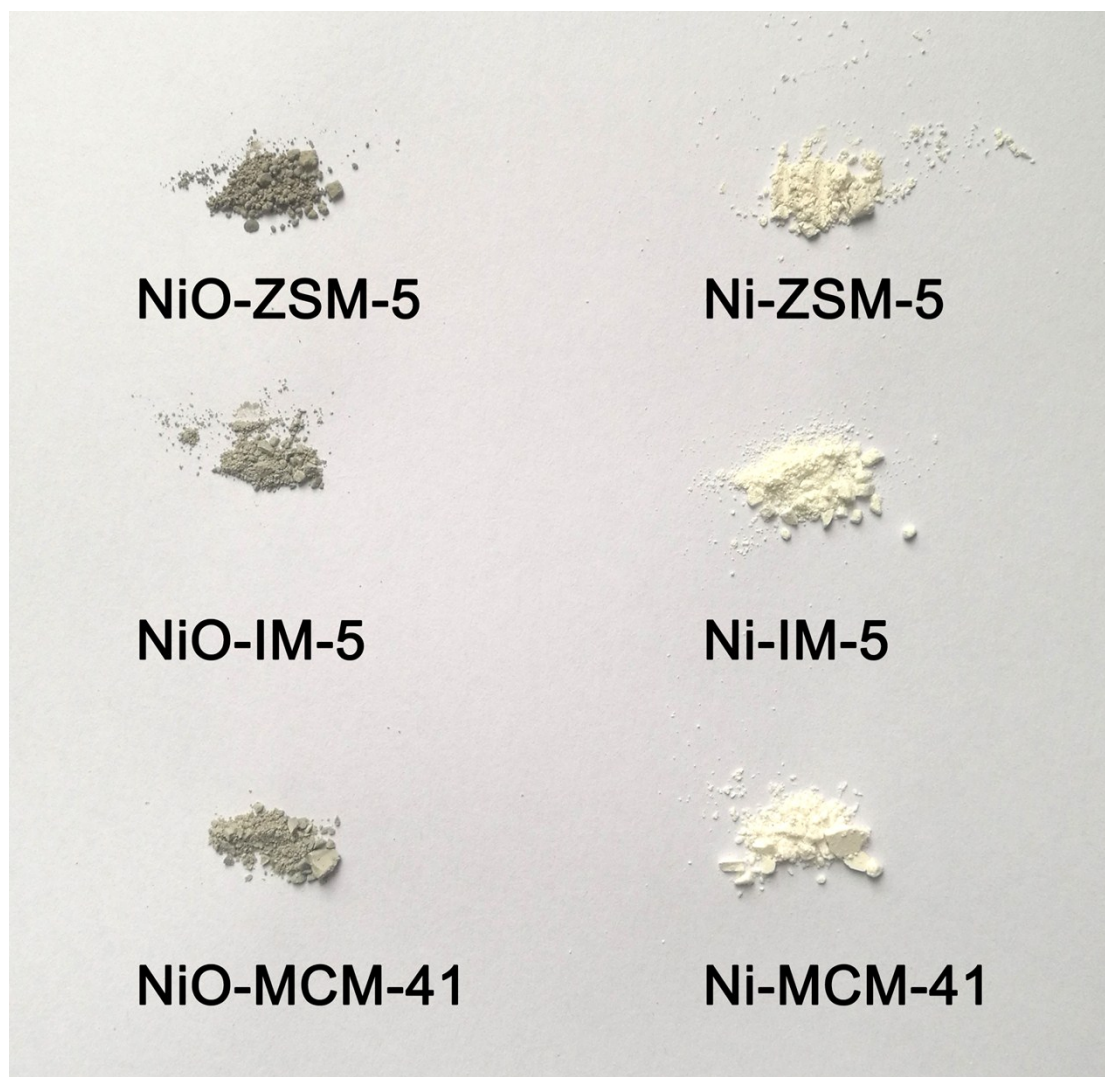

**Fig. S3. Photograph of Ni-modified catalysts prepared by incipient wetness impregnation (left column) and ion exchanged (right column)**
